# Supplementary material for: Structure-Based Design of Small Imine Reductase Panels for Target Substrates
Source: PubMed Central journal article supplement (PMC10510103; doi:10.1021/acscatal.3c02278), 2023-09-05
Supplement: cs3c02278_si_001.pdf [file cs3c02278_si_001.pdf]

# Supplementary information

## Structure-based design of small imine reductase panels for target substrates

Yuqi Yu<sup>a,b,\*</sup>, Arnau Rué Casamajo<sup>a</sup>, William Finnigan<sup>a</sup>, Christian Schnepel<sup>a</sup>, Rhys Barker<sup>a</sup>, Charlotte Morrill<sup>a</sup>, Rachel S. Heath<sup>a</sup>, Leonardo De Maria<sup>c</sup>, Nicholas J. Turner<sup>a,\*</sup>, Nigel S. Scrutton<sup>a,\*</sup>

<sup>a</sup>Department of Chemistry, The University of Manchester, Manchester Institute of Biotechnology, 131 Princess Street, Manchester, M1 7DN, UK.

<sup>b</sup>Augmented Biologics Discovery & Design, Department of Biologics Engineering, BioPharmaceuticals R&D, AstraZeneca, Cambridge, CB21 6GH, UK.

<sup>c</sup>Medicinal Chemistry, Research and Early Development, Respiratory and Immunology (RI), BioPharmaceuticals R&D, AstraZeneca, Gothenburg 43150, Sweden

\*Email: [nigel.scrutton@manchester.ac.uk](mailto:nigel.scrutton@manchester.ac.uk); [nicholas.turner@manchester.ac.uk](mailto:nicholas.turner@manchester.ac.uk); [yuqi.yu@manchester.ac.uk](mailto:yuqi.yu@manchester.ac.uk);

## Table of Contents

|                                                                                                                             |    |
|-----------------------------------------------------------------------------------------------------------------------------|----|
| <b>Table S1.</b> Hit rate in 20 sequences by IREDFisher and random selection                                                | 3  |
| <b>Table S2.</b> Likelihood to retrieve the best hit by IREDFisher and Random selection                                     | 4  |
| <b>Figure S1.</b> Examples of pharmaceutically relevant 4-formylbenzoic acid benzaldehyde derivatives                       | 5  |
| <b>Figure S2.</b> Comparison of imine reductase structures predicted by homology modelling and AlphaFold.                   | 6  |
| <b>Analytical methods</b>                                                                                                   | 7  |
| <b>Figure S3.</b> Scheme of reductive amination of cyclohexanone with cyclopropylamine for the synthesis of <b>18</b>       | 8  |
| <b>Figure S4.</b> GC-MS spectra from screening for the synthesis of <b>18</b>                                               | 9  |
| <b>Table S3.</b> Retention times from GC-MS analysis for test reaction <b>18</b>                                            | 9  |
| <b>Figure S5.</b> Scheme of reductive amination of chlorocyclohexanone with cyclopropylamine for the synthesis of <b>26</b> | 10 |
| <b>Figure S6.</b> GC-MS spectra from screening for the synthesis of reaction <b>26</b>                                      | 11 |
| <b>Table S4.</b> Retention times from GC-MS analysis for test reaction <b>26</b>                                            | 11 |
| <b>Figure S7.</b> Scheme of reductive amination of cycloheptanone with propargylamine for the synthesis of <b>27</b>        | 12 |
| <b>Figure S8.</b> GC-MS spectra from screening for the synthesis of <b>27</b>                                               | 13 |
| <b>Table S5.</b> Retention times from GC-MS analysis for test reaction <b>27</b>                                            | 13 |
| <b>Figure S9.</b> Scheme of reductive amination of benzaldehyde with cyclopropylamine for the synthesis of <b>25</b>        | 14 |
| <b>Figure S10.</b> LC/MS chromatograms from screening for the synthesis of <b>25</b>                                        | 14 |
| <b>Table S6.</b> Retention times from HPLC analysis for test reaction <b>25</b>                                             | 15 |
| <b>Figure S11.</b> Scheme of reductive amination of 4-formylbenzoic acid with cyclopropylamine for synthesis of <b>28</b>   | 16 |
| <b>Figure S12.</b> HPLC chromatograms from screening for the synthesis of compound <b>28</b>                                | 16 |
| <b>Table S7.</b> Retention times from HPLC analysis for test reaction <b>28</b>                                             | 17 |
| <b>IRED Sequences</b>                                                                                                       | 17 |

**Table S1. Hit rate in 20 sequences by IREDFisher and random selection.** As a control, 20 sequences were randomly selected from the panels 1000 times and the average hit rate was calculated. The margin of error was calculated based on 95% confidence levels.

| Reaction | Hit rate by IREDFisher (Conv. $\geq$ 50%) | Hit rate by random selection (Conv. $\geq$ 50%) | Improvement by IREDFisher <sup>2</sup> (Conv. $\geq$ 50%) | Hit rate by IREDFisher (Conv. $\geq$ 2%) | Hit rate by random selection (Conv. $\geq$ 2%) | Improvement by IREDFisher <sup>2</sup> (Conv. $\geq$ 2%) |
|----------|-------------------------------------------|-------------------------------------------------|-----------------------------------------------------------|------------------------------------------|------------------------------------------------|----------------------------------------------------------|
| 1        | 20%                                       | 7% $\pm$ 0.3%                                   | 1.90                                                      | 30%                                      | 17% $\pm$ 0.4%                                 | 0.82                                                     |
| 2        | 15%                                       | 5% $\pm$ 0.2%                                   | 2.33                                                      | 55%                                      | 40% $\pm$ 0.6%                                 | 0.39                                                     |
| 3        | 25%                                       | 9% $\pm$ 0.3%                                   | 1.66                                                      | 70%                                      | 62% $\pm$ 0.6%                                 | 0.14                                                     |
| 4        | 5%                                        | 2% $\pm$ 0.2%                                   | 1.27                                                      | 75%                                      | 69% $\pm$ 0.6%                                 | 0.08                                                     |
| 5        | 0%                                        | 0% $\pm$ 0.0%                                   | NA                                                        | 20%                                      | 6% $\pm$ 0.3%                                  | 2.33                                                     |
| 6        | 15%                                       | 6% $\pm$ 0.3%                                   | 1.46                                                      | 70%                                      | 66% $\pm$ 0.6%                                 | 0.06                                                     |
| 7        | 30%                                       | 21% $\pm$ 0.5%                                  | 0.43                                                      | 85%                                      | 65% $\pm$ 0.6%                                 | 0.32                                                     |
| 8        | NA <sup>1</sup>                           | NA <sup>1</sup>                                 | NA <sup>1</sup>                                           | 15%                                      | 11% $\pm$ 0.4%                                 | 0.42                                                     |
| 9        | NA <sup>1</sup>                           | NA <sup>1</sup>                                 | NA <sup>1</sup>                                           | 20%                                      | 12% $\pm$ 0.4%                                 | 0.69                                                     |
| 10       | 70%                                       | 36% $\pm$ 0.5%                                  | 0.92                                                      | 75%                                      | 57% $\pm$ 0.5%                                 | 0.32                                                     |
| 11       | 45%                                       | 25% $\pm$ 0.5%                                  | 0.82                                                      | 85%                                      | 66% $\pm$ 0.5%                                 | 0.30                                                     |
| 12       | 40%                                       | 23% $\pm$ 0.4%                                  | 0.75                                                      | 80%                                      | 68% $\pm$ 0.5%                                 | 0.17                                                     |
| 13       | NA                                        | NA <sup>1</sup>                                 | NA <sup>1</sup>                                           | 35%                                      | 21% $\pm$ 0.4%                                 | 0.70                                                     |
| 14       | 45%                                       | 23% $\pm$ 0.4%                                  | 0.96                                                      | 90%                                      | 66% $\pm$ 0.5%                                 | 0.37                                                     |
| 15       | NA                                        | NA <sup>1</sup>                                 | NA <sup>1</sup>                                           | 70%                                      | 36% $\pm$ 0.5%                                 | 0.94                                                     |
| 16       | 40%                                       | 18% $\pm$ 0.4%                                  | 1.22                                                      | 60%                                      | 34% $\pm$ 0.5%                                 | 0.76                                                     |
| 17       | 25%                                       | 11% $\pm$ 0.3%                                  | 1.25                                                      | 75%                                      | 62% $\pm$ 0.5%                                 | 0.21                                                     |
| 18       | 70%                                       | 54% $\pm$ 0.6%                                  | 0.30                                                      | 95%                                      | 91% $\pm$ 0.3%                                 | 0.04                                                     |
| 19       | 20%                                       | 14% $\pm$ 0.4%                                  | 0.43                                                      | 50%                                      | 46% $\pm$ 0.6%                                 | 0.10                                                     |
| 20       | 10%                                       | 8% $\pm$ 0.3%                                   | 0.33                                                      | 45%                                      | 40% $\pm$ 0.6%                                 | 0.13                                                     |
| 21       | 5%                                        | 3% $\pm$ 0.2%                                   | 0.61                                                      | 30%                                      | 37% $\pm$ 0.6%                                 | -0.19                                                    |
| 22       | 60%                                       | 36% $\pm$ 0.6%                                  | 0.66                                                      | 80%                                      | 66% $\pm$ 0.6%                                 | 0.22                                                     |
| 23       | 15%                                       | 9% $\pm$ 0.4%                                   | 0.60                                                      | 60%                                      | 61% $\pm$ 0.6%                                 | -0.01                                                    |
| 24       | 30%                                       | 20% $\pm$ 0.5%                                  | 0.47                                                      | 55%                                      | 61% $\pm$ 0.6%                                 | -0.09                                                    |

<sup>1</sup> No hits with conversion over 50% were found in the overall screening.

$$^2 \text{Improvement by IREDFisher} = \frac{\text{Hit rate by IREDFisher} - \text{Hit rate by random selection}}{\text{Hit rate by random selection}}$$

**Table S2. Likelihood to retrieve the best hit by IREDFisher and Random selection.** In most cases, IREDFisher was able to retrieve the best hit(s) from the whole panel. In some cases where the best hit did not appear, the second best hit was found. By comparison, random selection has a much lower chance of obtaining the best hit(s).

| Reaction | Best hit | IREDFisher                       | Random selection |
|----------|----------|----------------------------------|------------------|
| 1        | IR-10    | Yes: Rank 10 <sup>th</sup>       | 22% ± 2.6%       |
| 2        | IR-01    | Yes: Rank 9 <sup>th</sup>        | 23% ± 2.6%       |
| 3        | IR-01    | Yes: Rank 10 <sup>th</sup>       | 22% ± 2.6%       |
| 4        | IR-13    | No, IR-10 Rank 11 <sup>th</sup>  | 23% ± 2.6%       |
| 5        | IR-01    | No, IR10 Rank 10 <sup>th</sup>   | 24% ± 2.6%       |
| 6        | IR-01    | Yes: Rank 9 <sup>th</sup>        | 25% ± 2.7%       |
| 7        | IR-01    | Yes: Rank 12 <sup>th</sup>       | 23% ± 2.6%       |
| 8        | IR-01    | Yes: Rank 16 <sup>th</sup>       | 25% ± 2.7%       |
| 9        | IR01     | No, IR-59 Rank 12 <sup>th</sup>  | 23% ± 2.6%       |
| 10       | IR81     | Yes: Rank 7 <sup>th</sup>        | 45% ± 3.1%       |
| 11       | IR44     | Yes: Rank 19 <sup>th</sup>       | 43% ± 3.1%       |
| 12       | IR56     | Yes: Rank 7 <sup>th</sup>        | 47% ± 3.1%       |
| 13       | IR47     | Yes: Rank 16 <sup>th</sup>       | 45% ± 3.1%       |
| 14       | IR44     | Yes: Rank 8 <sup>th</sup>        | 48% ± 3.1%       |
| 15       | IR50     | Yes: Rank 13 <sup>th</sup>       | 46% ± 3.1%       |
| 16       | IR47     | Yes: Rank 3 <sup>th</sup>        | 47% ± 3.1%       |
| 17       | IR81     | Yes: Rank 10 <sup>th</sup>       | 44% ± 3.1%       |
| 18       | p-IR33   | Yes: Rank 1 <sup>th</sup>        | 24% ± 2.6%       |
| 19       | p-IR82   | Yes: Rank 8 <sup>th</sup>        | 21% ± 2.5%       |
| 20       | p-IR23   | No; p-IR16 Rank 19 <sup>th</sup> | 21% ± 2.5%       |
| 21       | p-IR23   | Yes: Rank 5 <sup>th</sup>        | 18% ± 2.4%       |
| 22       | p- IR49  | Yes: Rank 1 <sup>th</sup>        | 21% ± 2.5%       |
| 23       | p-IR23   | Yes: Rank 1 <sup>th</sup>        | 23% ± 2.6%       |
| 24       | p-IR49   | Yes: Rank 3 <sup>th</sup>        | 23% ± 2.6%       |

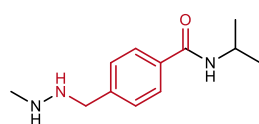

**Procarbazine**

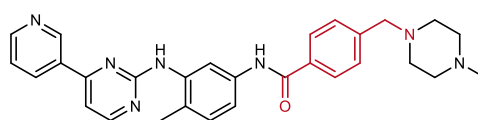

**Imatinib**

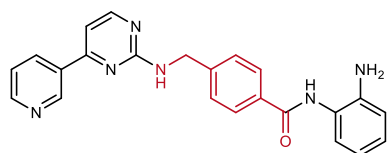

**Mocetinostat**

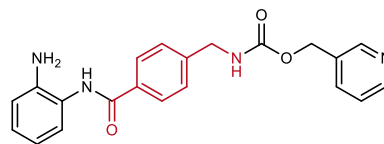

**Etinostat**

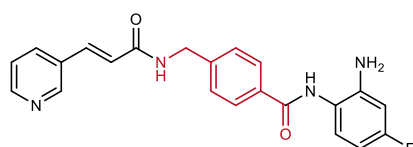

**Tucidinostat**

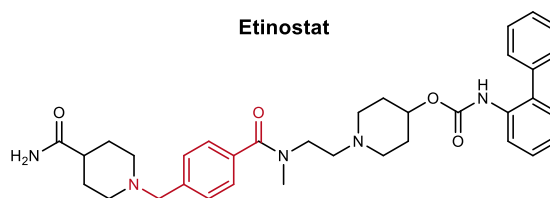

**Revefenacin**

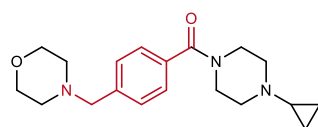

**Bavisant**

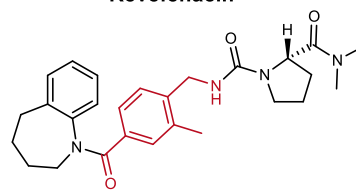

**Fedovapagon**

**Figure S1. Examples of pharmaceutically relevant 4-formylbenzoic acid benzaldehyde (highlighted in red) derivatives.**

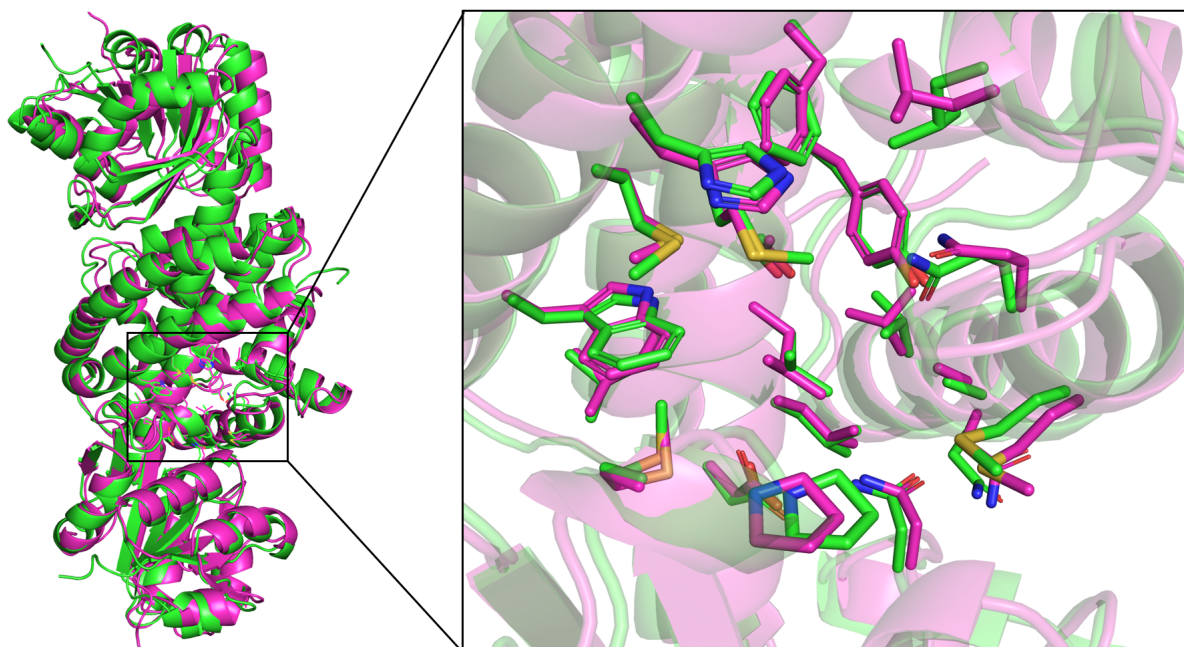

**Figure S2. Structural comparison of an imine reductase predicted by homology modelling (in magenta) and AlphaFold (in green).** Left panel, the overall structure. Right panel, a close-up view of amino acids in the substrate-binding site. Side chains in the active site were aligned, resulting in a root mean square deviation about 1.02 Å.

## **Analytical methods**

### GC-MS

Test reaction **18**, **26** and **27**. The mixture was analysed by GC-MS using the following conditions: hold at 40°C for 3 minutes, 40-300°C (30 °C / min) and 0.5 minutes for equilibration. Injector temperature 270 °C; inlet pressure 5.34 psi; detector temperature 300 °C; helium flow 2 ml/min; transfer line 320 °C, quadrupole 150 °C, ion source 230 °C; column Agilent HP-1MS (30 m × 0.32 mm × 0.25 µm).

### HPLC and LC/MS

Test reaction **25** and **28**. The mixture was analysed by HPLC and corroborated by LC/MS using the following conditions: eluent MeCN/H<sub>2</sub>O + 0.1% trifluoroacetic acid with a gradient method from 5% to 95% MeCN for 15 minutes. Flow 0.5 ml/min; column temperature 40 °C; injection volume 5 µl; UV detection at  $\lambda = 210$  nm, column: Phenomenex Luna 3 µm C18(2) 100 Å.

### Test reaction 18 scheme

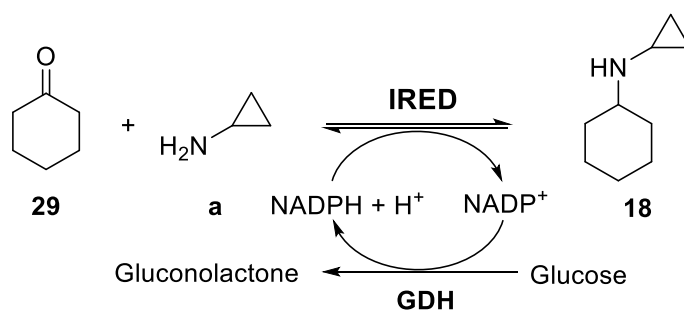

**Figure S3.** Scheme of reductive amination of cyclohexanone with cyclopropylamine for the synthesis of **18**. Cofactor regeneration system consists of GDH, NADP<sup>+</sup> and glucose.

### Test reaction 18 chromatograms

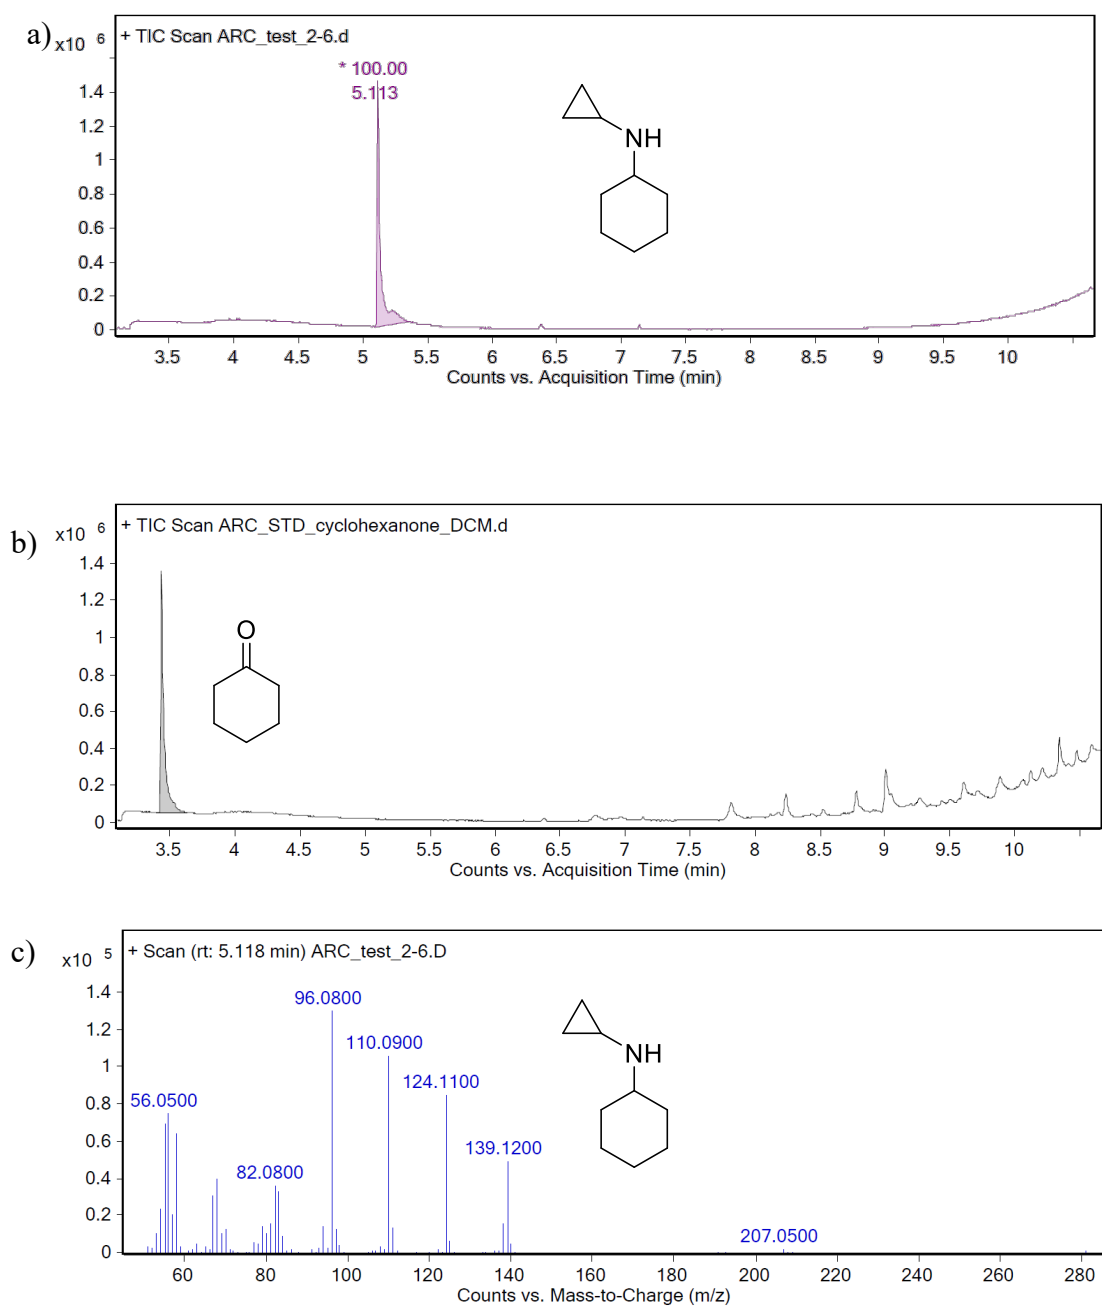



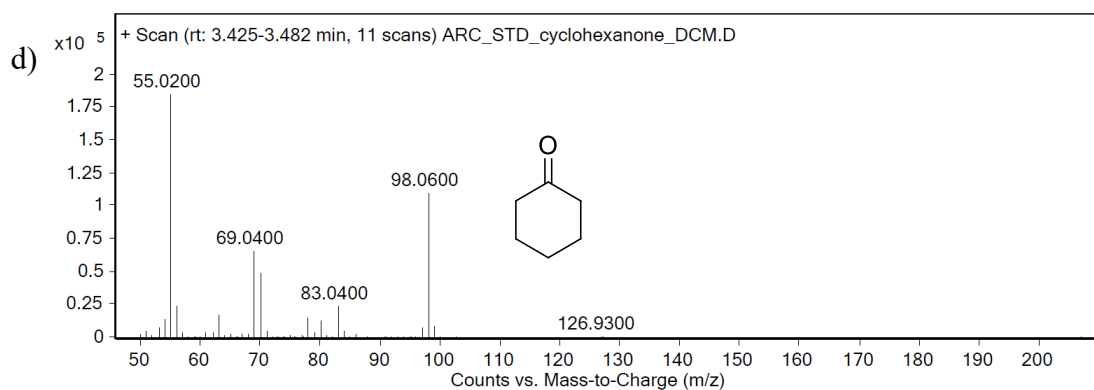

**Figure S4.** GC-MS spectra from screening for the synthesis of **18**. a) GC-MS chromatogram of cyclohexanone reductive amination with cyclopropylamine which exhibited >99% conversion. b) GC-MS chromatogram of cyclohexanone (**29**) standard. c) GC-MS spectra of peak at  $R_t = 5.11$  min corresponding to GC-MS chromatogram a. d) GC-MS spectra of peak at  $R_t = 3.45$  min corresponding to GC-MS chromatogram b.

**Table S3.** Retention times from GC-MS analysis for test reaction **18**.

| Compound                                  | Retention time (minutes) |
|-------------------------------------------|--------------------------|
| <i>2-cyclohexanone (29)</i>               | 3.5                      |
| <i>N-cyclopropylcyclo hexanamine (18)</i> | 5.1                      |

### Test reaction 26 scheme

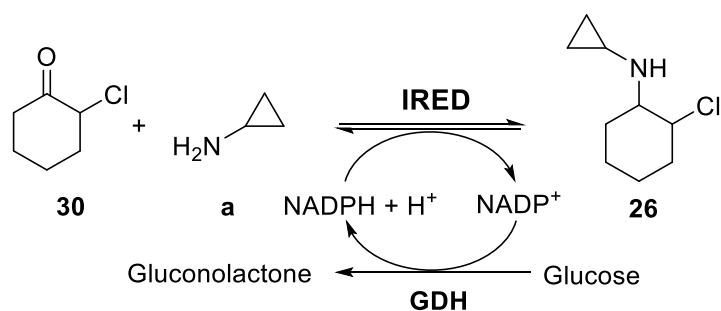

**Figure S5.** Scheme of reductive amination of 2-chlorocyclohexanone with cyclopropylamine for the synthesis of **26**. Cofactor regeneration system consists of GDH, NADP<sup>+</sup> and glucose.

### Test reaction 26 chromatograms

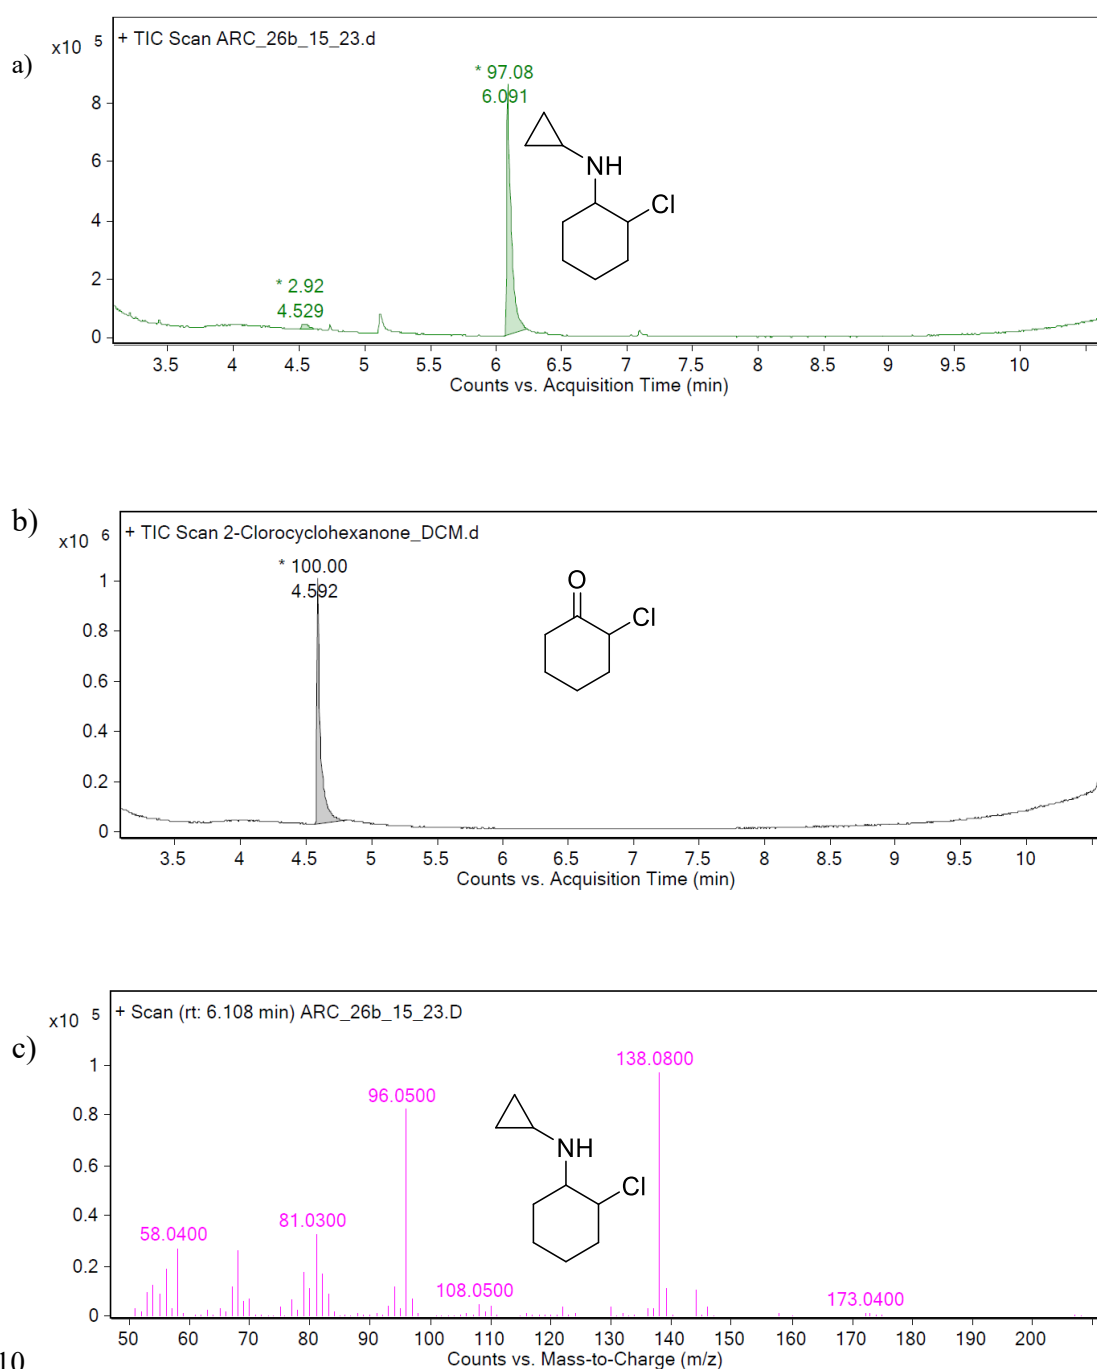

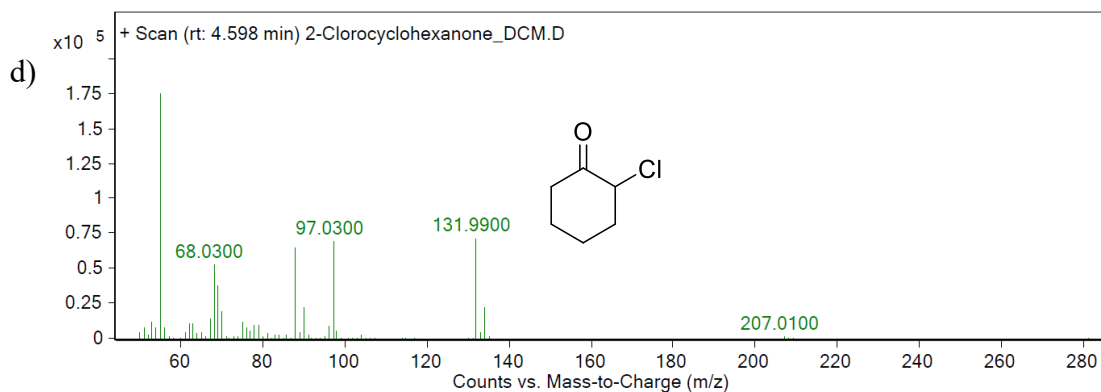

**Figure S6.** GC-MS spectra from screening for the synthesis of **26**. a) GC-MS chromatogram of 2-chlorocyclohexanone reductive amination with cyclopropylamine which exhibited 97% conversion. b) GC-MS chromatogram of cyclohexanone (**30**) standard. c) GC-MS spectra of peak at  $R_t = 6.1$  min corresponding to GC-MS chromatogram a. d) GC-MS spectra of peak at  $R_t = 4.6$  min corresponding to GC-MS chromatogram b.

**Table S4.** Retention times from GC-MS analysis for test reaction **26**.

| Compound                                          | Retention time (minutes) |
|---------------------------------------------------|--------------------------|
| <i>2-chloro-cyclohexanone (30)</i>                | 6.1                      |
| <i>2-chloro-N-cyclopropylcyclohexanamine (26)</i> | 4.6                      |

### Test reaction 27 scheme

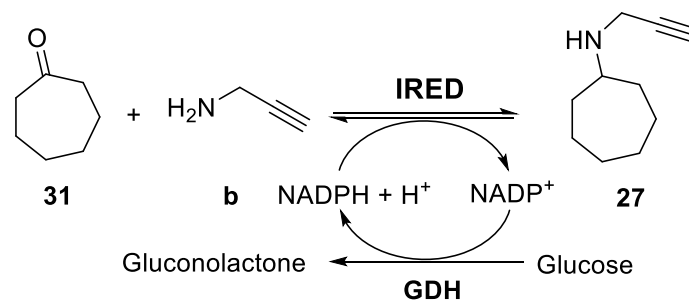

**Figure S7.** Scheme of reductive amination of cycloheptanone with propargylamine for the synthesis of **27**. Cofactor regeneration system consists of GDH,  $\text{NADP}^+$  and glucose.  
Test reaction 27 chromatograms

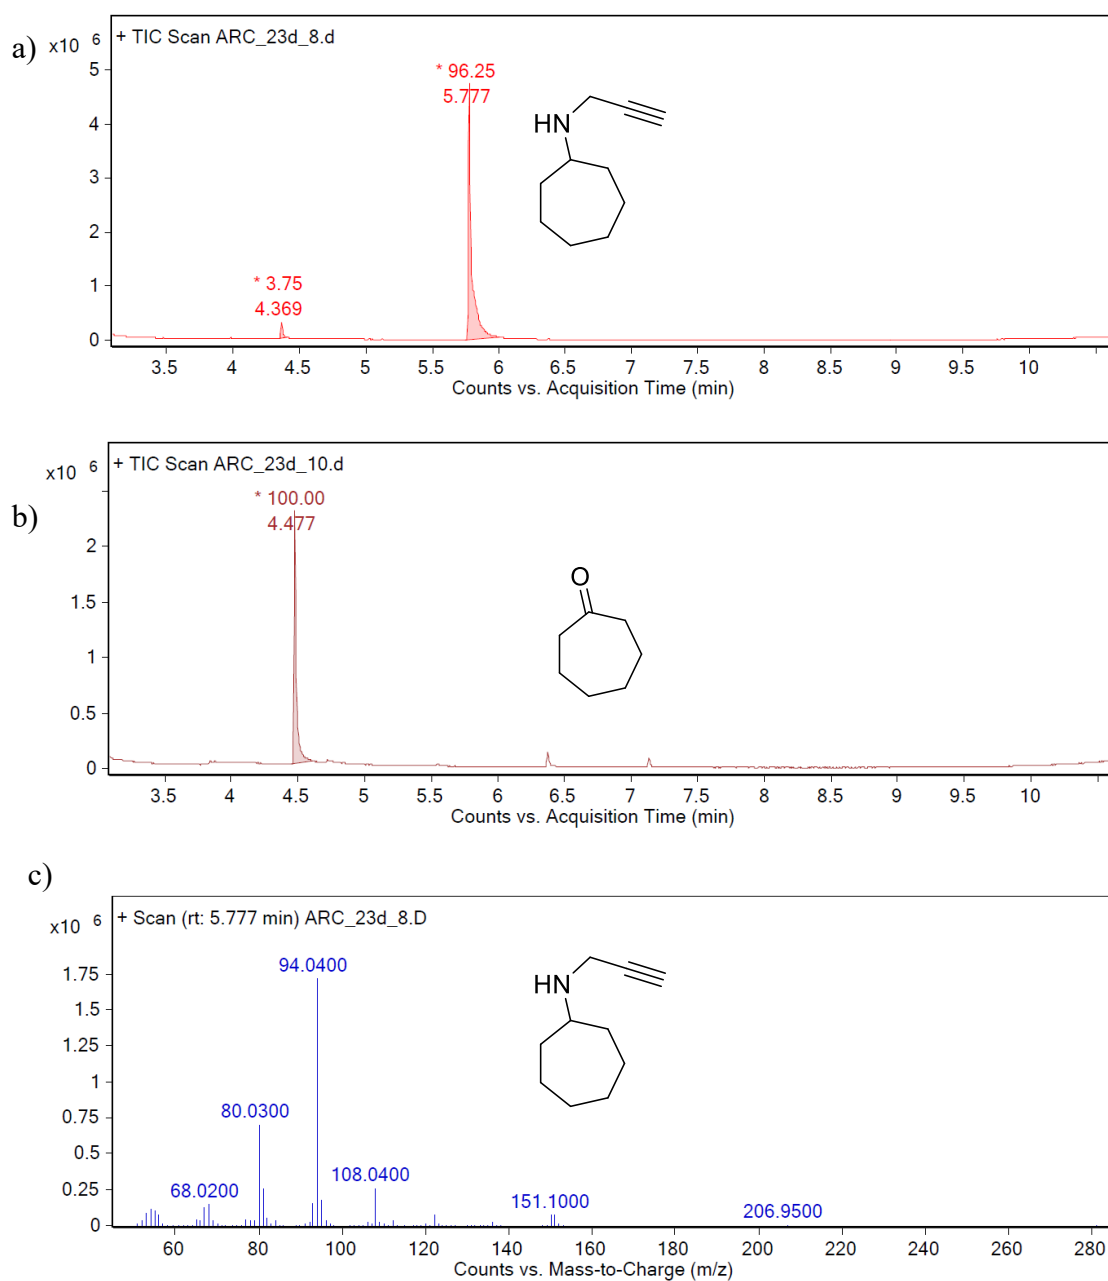

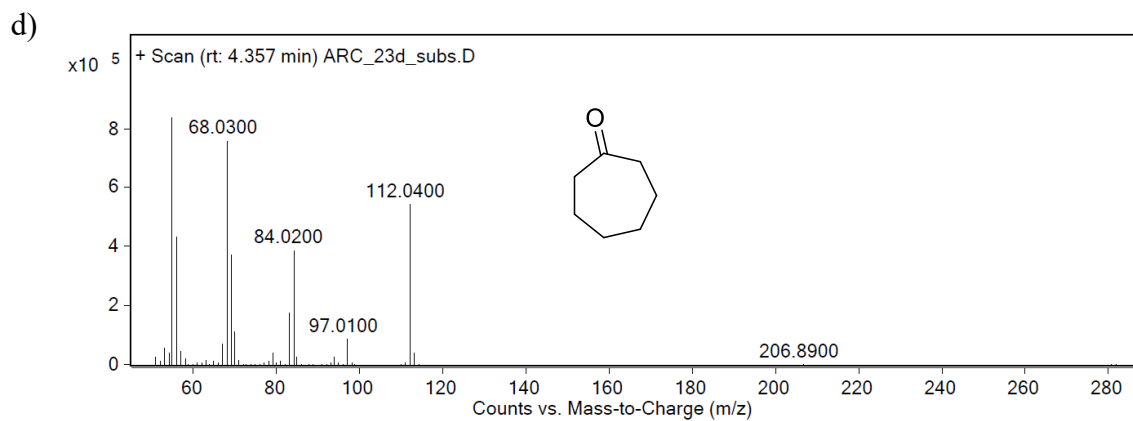

**Figure S8.** GC-MS spectra from screening for the synthesis of **27**. a) GC-MS chromatogram of cycloheptanone reductive amination with propargylamine which exhibited 96% conversion. b) GC-MS chromatogram of cyclohexanone (**31**) standard. c) GC-MS spectra of peak at  $R_t = 5.8$  min corresponding to GC-MS chromatogram. d) GC-MS spectra of peak at  $R_t = 4.4$  min corresponding to GC-MS chromatogram a.

**Table S5.** Retention times from GC-MS analysis for test reaction **27**.

| Compound                              | Retention time (minutes) |
|---------------------------------------|--------------------------|
| <i>Cycloheptanone (31)</i>            | 5.8                      |
| <i>N-propargylcycloheptamine (27)</i> | 4.4                      |

### Test reaction **25** scheme

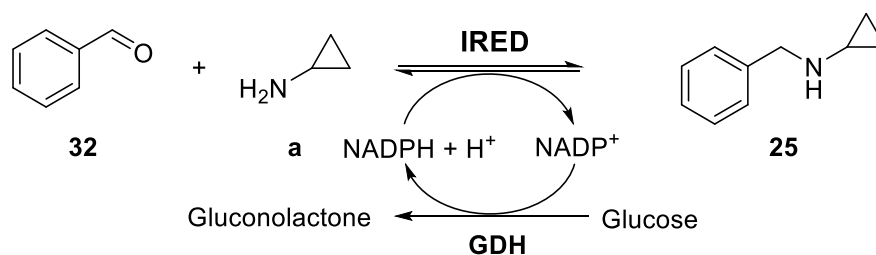

**Figure S9.** Scheme of reductive amination of benzaldehyde with cyclopropylamine for the synthesis of **25**. Cofactor regeneration system consists of GDH,  $\text{NADP}^+$  and glucose.

### Test reaction **25** chromatograms

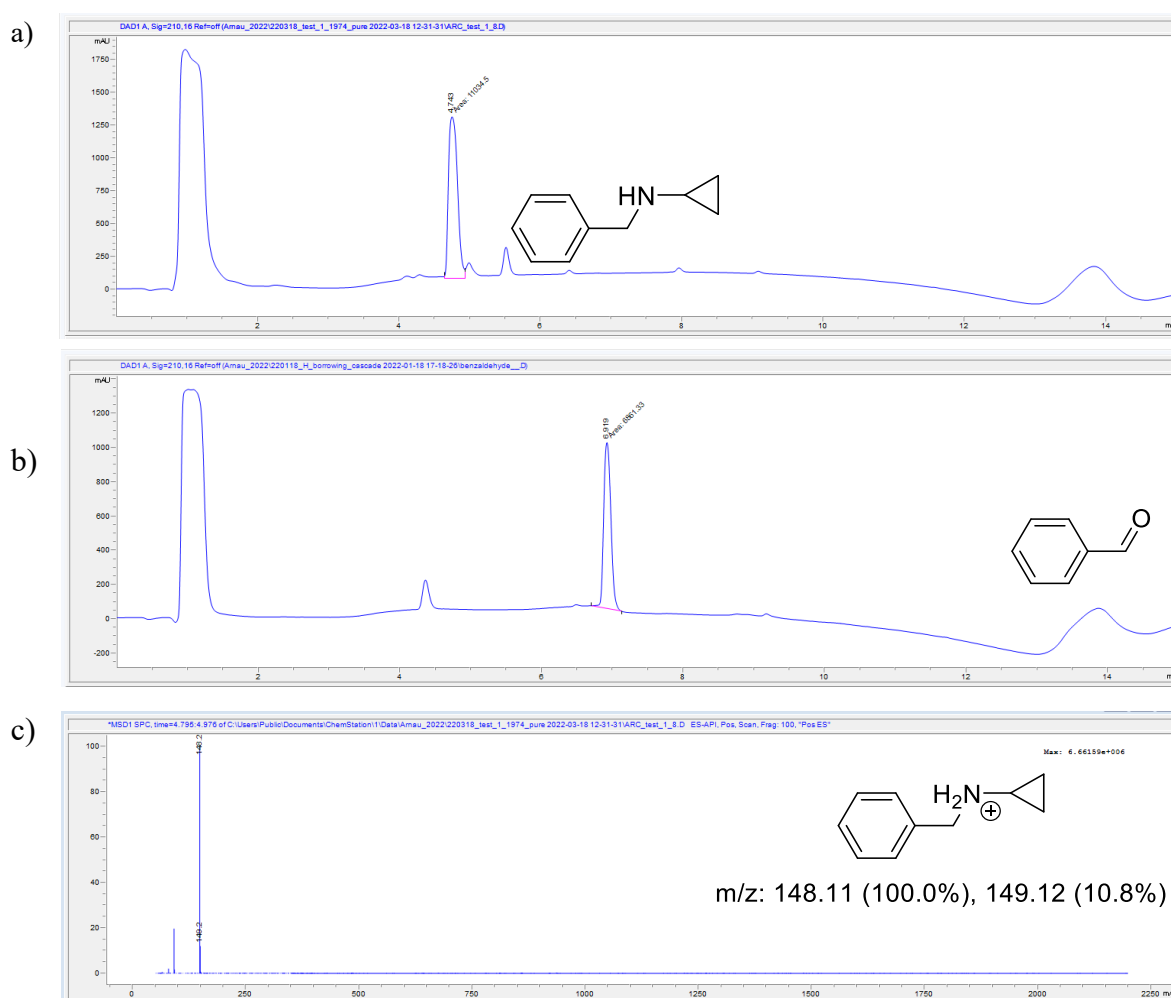

**Figure S10.** LC/MS chromatograms from screening for the synthesis of **25**. a) LC/MS chromatogram of benzaldehyde reductive amination with cyclopropylamine which exhibited 96% conversion. b) LC/MS chromatogram of benzaldehyde (**32**) standard c) LC/MS spectra of peak at  $R_t = 4.7$  min corresponding to GC-MS chromatogram a.

**Table S6.** Retention times from HPLC analysis for test reaction **25**.

| <b>Compound</b>                      | <b>Retention time<br/>(minutes)</b> |
|--------------------------------------|-------------------------------------|
| <i>Benzaldehyde (32)</i>             | 6.9                                 |
| <i>N-benzylcyclopropylamine (25)</i> | 4.7                                 |

### Test reaction **28** scheme

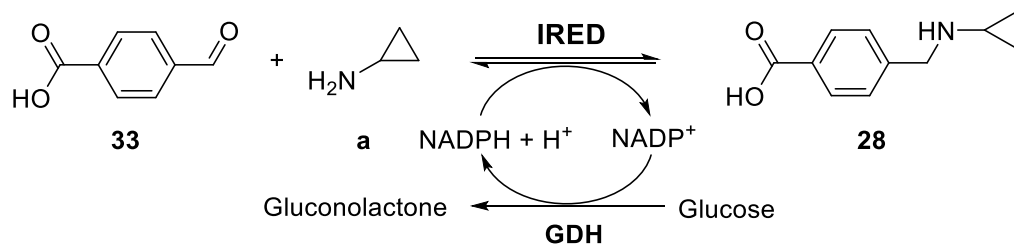

**Figure S11.** Scheme of reductive amination of 4-formylbenzoic acid with cyclopropylamine for synthesis of **28**. Cofactor regeneration system consists of GDH, NADP<sup>+</sup> and glucose.

### Test reaction **28** chromatograms

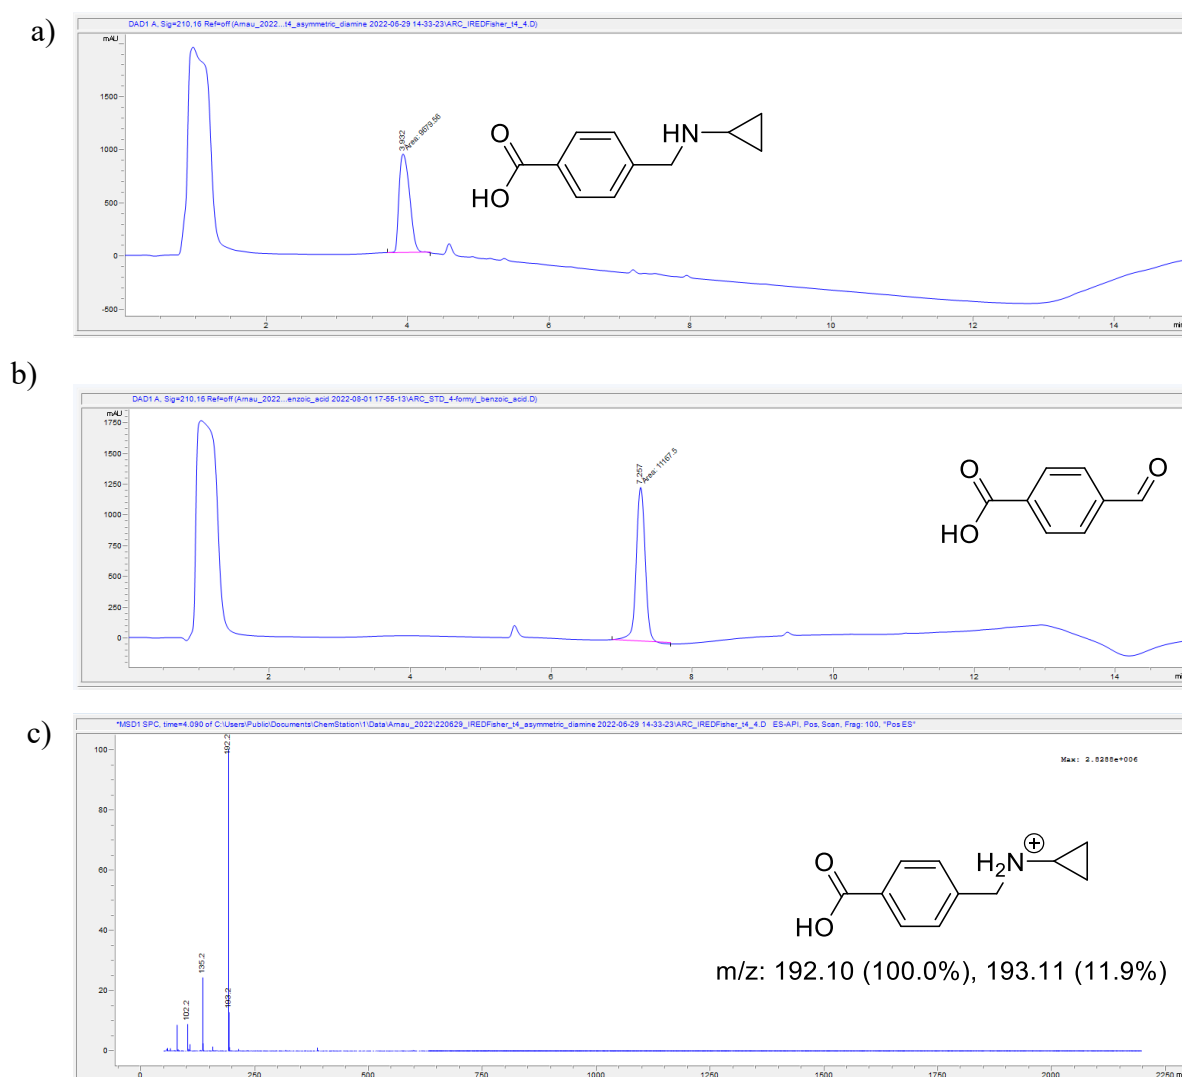

**Figure S12.** HPLC chromatograms from screening for the synthesis of **28**. a) LC/MS chromatogram of 4-formylbenzoic acid reductive amination with cyclopropylamine which exhibited 95% conversion. b) LC/MS chromatogram of 4-formylbenzoic acid (**33**) standard c) LC/MS spectra of peak at R<sub>t</sub> = 3.9 min corresponding to GC-MS chromatogram a.



**Table S7.** Retention times from HPLC analysis for test reaction **28**.

| Compound                                             | Retention time (minutes) |
|------------------------------------------------------|--------------------------|
| <i>4-formylbenzoic acid (33)</i>                     | 7.2                      |
| <i>4-((cyclopropylamino)methyl)benzoic acid (28)</i> | 3.9                      |

### IRED Sequences

>yIRED1

MTNQTAEQSVTVIGLGAMGRALAGAFIREGHRRTTVWNRTAEKADELVARGAVLAGSVGEAVAASPLVVVCVTDYDAVRELLDPVDLGDRAVVNLTSGTPGAARELAGRVGAYLDGGIMATPAAVGTAEAVLVCSGSRAAFERYEPVLRGLGAETVYLGEDAGLAALYEVGVLGLMWSTLNGFLQGAALARAAGLDAASFAPLAVKSMESVAGWLPDYARQIDEGSYPLDATIDVHLAAMRNLIIESESLGVSTELPRFVKALADRAVAEGRGEEGYAALVEQFGKPS

>yIRED2

MTEQLTSSSDTDRQAVTVLGLGLMGQALAGAFILAAGHRRTTVWNRSAAKAEELAAQGATLAATLRDAVAASPLVIVCVTDYPAVRALLDPVSADLVGRVVNLTSGTSQQARETAEWAAQHGFSYLDGVILAIPSAIATDEAVLLYSGPRAAFDAHEQTLGSLGAATSHLGADHGLSALYDMAMLSLMSVNLNGFLHGAALLGTAQVDATTLAPFLTQGLHTMSGWLTATAAQIDAGAYPAEDSTLDVHLAAMAHLVEESEAVGVNAELPRLAQALAGR AVDEGRGGDDYAALIEQFRKPAPR

>yIRED3

MNAAAPVTVLGLGLMGQALAEAFIREGHATTVWNRTAAKAEPLVAKGARLADSVADAVAASPLVIVCVLDYDAVHQLLDPVAGALDGRVLVNLTSGTSEGARETARWAAEHGAAYLDGAILTDPDGVGTADAVILYSGPHAVFEAHEPTLGLLGGATTHLGDDHGLSSLHDVAVLGLMWGVLNSFLQGAAVLGAAGVDASTFAPLAAKSVKMOVADWVPGYAEQIDNGVYPAVDATLNTHLASMNHLVHESEFLGVSAEFPKLVRAMAERSVANGHGAEGYASMIELFRKPSGTRE

>yIRED4

MAHHASTRTSTETSTETSTDVTIIGLGLMGRALADAVLAAGHRVTVWNRTAAKAEGLVSRGARLAESVESAVLASPVIVCVADYESLQQAFASVSGELDGRVLVNLTSGDPEQARELARWADQGGARSLDGAIMAVPSTIGTADAIILSGSRAAFESHQPLLAALGDATFLGDDHGLSALYDVAGLSVMWGVNLAWLQGVALLGTAGVDASTFTPFATQVAQETVWLSGYADQVDRGSYPPDDATLATHAGGIAHLVRVSEQLGVDAELPRLFQSLVARALAAGQADQSYAALIEQLTPGARTS

>yIRED5

MTNNTHKTDSPVTVIGLGLMGQALAPAFLKAGHATTVWNRTAGKADHVVSQGAQLAPTVGDAVKAGGPVCLTDYAAVRELLGGSEVDLAGAMLVNLTSGDSAQARET

ARWATERGARYLDGAVMAVPPAIGTDAAVILHSGPEADFQEYEPTLAALGTVTHLG  
VDHGLASLYDAAGLTMMWSILNAWLQGIALLRTAGVDAATFAPFAQQMAATVAG  
WLPYDAEQIDKGDFATEVSTLGTHTRAMEHLIEESETAGINAELPKLIKALADRAIAA  
GHADLEYAVLIEEFTKPG

>yIRE6

MTSPTDSVTLIGLGLMGKALAGALLGAGHRRTTVWNRTAAKAEELVAQGALLADS  
ADSAVTASPVIITCVSDYASLQQVLTVPADGLGGRVLVNLTSGDSAQAQEMARWTE  
KQGGIYLDGAIMAVPPTIGTAAAVILLSGPESAFTHQSTFDALGTTAYLGEDHGLSA  
LYDVAGLSMMWGVNLAWLHGVALLGTAGVNSTYTPFAAQIAQETVWLAGYAD  
QVDSATYPPDDATLDTHAGGMTHLIEESERLGVNAEMPRLFALVDRAIAAGQGGG  
SYPVLEQFAQPRATSR

>yIRE7

MNNAPATNTAPVTKNAPAANTAPVTDDAPVTVTVIGLGLMGQALATAFLKAGHPT  
TVWNRTPAKAEDLAARGAAVAPTVEAVLASSLIVVCLSDSAAVHDTVGPRAELA  
GRTL VNLTSGTSDEARETAAWATDFAYLDGAIMAIPVISRPEAFLLFSGAPEAFERH  
EETLKTGNAVFFGEDPGLASLYDVALLGVMWGTLNFLHGAALLGAAKVDASAF  
APFANQWLSSVTGFVSAYAEQIDRGAYPAEDAALETHLATMKYLVRESAAAGIDTD  
WPARIQALAERAIEAGHTGAGYAGLIEVFRGQA

>yIRE8

MNTDSSRVATPAGTDPGRSRTRTPVTVLGLGMMGRALAAFLRDGHPTTVWNRTA  
AKAGPLVAEGATLAASPAEAVAAAPLVVVCLSDHASVRAVLDPVGGALDGRTVAN  
LSSGTSGEARETAAALARHGAAYLGGAIMAVPETIGTADALLVYSGPRAVDFDRHEPV  
LRSLGTGTSHLGDEHGLASLNEMAVLSVMWHVNLGFLHGAALLGAAGVDAAAFAP  
LAKAGIETTAGWVADYARQIDDGEYPLDATIDTHLTTMRHLVAESEALGVDAAPP  
ALIAAPAERA VAAGRGGDGYAALIEQFRKPSEG

>yIRE9

MAGDDRRTVSVVGLGPMGTALAGAFLENGHPTTVWNRTASKAGDLVARGATHAA  
TVSDAVSASTLVVVCVSVNEIVRKLSSLDLGGKAIVNLTSGTPEEARETAVWAA  
EHGADYLDGAIMANPRHIGQLETMLLYSGSPVFEAHEPTLSLLGGATHVGTDPGLA  
SLFDAALGGLAWSTWSSFLHGAALVGTEDVKAMAFAPIAAQWLA AVAGIMADYAR  
QVDDGHYPGDEETLEINAAAMDHLINASRAQQIGVDLPNFKALTERAIAAGHGSDS  
FASVIEAIRTPSA

>yIRE10

MTKNPRTPTVTVLGLGMLGGEALAGAFLENGHPATVWNRTAAKADRLAGRGATRAGS  
ARDAVAAAPLVLVCLTGYDAVHEVLGPLGDVLDGRVVVNLTSGTSAEARDTAAW  
VERQGGTYLDGAIMAIPDAIGTPDAAVLYSGPRAAFDLHERALGSLGGTATYLGAD  
HGLSALYDVGVLSLMWNILNGFLQGAALLGAAGVEATAFAPVARNGIETVAGWLA  
GYARQIDDGVHPAADSTLDTHLAAMEHLVQESESHGVDAGLPRFIRALAAEAVAAG  
RGGEGYTALIDRFRKPSDHA

>yIRED11

MTTIGFLGAGRMGTALVAALCRTGRTVHVWNRRTAEKAQALAAFGARPETPEAAV  
AAADIVMVNLLDYVASDALFQRPEVTEALKGRLLVQLTSGSPKTARDTGAWATVK  
GIDYLDGAIMATPDFIGGVETQILYSGARDRYEKYEAVFAALGGKSAFVGEDFGVAS  
ALDGALLAQLWGTLFGTLQATTIARAEGIALDDYAASLKLFRPVIDGAEVDLLSRVR  
DGRDRGDEATLATIAAHNTAFQHLRHIVAERGLNPAITDAFDSYFAAAIANGHGND  
FAMLASYMVSQ

>yIRED12

MKTVAVIGLGQMGTTLARLFIEAGMQVRVWNRTRSKEPLASRGAIVAATAAAAM  
ADAEAVVICVHDYRATHDILSDVAVKSALKGKLLQLTTGSPQDARDMAELARIG  
AGYLDGALQVAPEQMGQPDTTVLVSGSGEDHALARELLAVLGGNVVYLGEDVAA  
AATMDLATLSYVYGASMGFFQGAALQAEGLDVGVYGGIVEAMSPSFGAFLRHEG  
NVIDNGDYAVSQSPLSISIDATGRIEQAMRQKGLRSELPSLIARLLRDAEEAGYGN  
FAAVAKILRGAAEPAPVR

>yIRED13

MSDGKKSAPAVAVIGTGAIGSALVHRLGSGYDITVWNRRTESRATLVAAGALPARS  
VREAVSSSTLVFLTLKDYTAVEQCLTQLDMDLSGHTIVGMYTGTSSPEARLAAQRAT  
TLGAHYIDAGIQASPEMIGTDTATILYSGSRHAFEQHKTTLLSKPRFVGETPEAAA  
VWDLALFGVWYDAQLGLLRALGAAHEAGIDVVEFSHTASTQLGHVVTGVSATVSE  
MQQATYPPGPADLTEHLAVVRHLIELRSGRRLGNGGLPEVAARIEALIADGRGDEGL  
TATVG

>yIRED14

MTGTGKITVIGLGAMGAAIAGALLAKGFHVTVWNRTPKAALLVQRGAVLASEPAA  
AIVASPVTVICVSDYDTATKILDMTGVPATLKGRTLILLSAGTPNDARSLDAWVHAE  
EGHCLHGGIAAWPRQIGTAEAMITASGDKAVFDQQRSVLEALAGTVHFAGEGPGTA  
ATLTTAAMAYLAGNWIGFCYGALICEKEGLKVDEFGQLMEGFTPMLAAEVRHMGE  
VIQHNRFSDPESTINTTGLDLRLLQHTREAGLHTALPELAADIFNKAIAAGYGKEEH  
AAIKILRKQDS

>yIRED15

MRTVVIGTNPRAAAIAAALAVPATDTVAGHADLVVVCVEDYSLVPRLPGDADIVNL  
TSGTSEDAARTADLFPGRYLDGALMAHPEHVGRPETVIVYSGSPDVFARTEKQLARL  
GSATYLGPAAGTASLYDAAMLNFAWATLTGYLQTAALLTSEGVAARAFTPMLNEW  
MRTTVAVIDDYADQIDTGQYPGDEEWLELDEPLMRDLITVTEQRGMDAALPKVV  
QDLTARGIAAGHGAESFASLVEVIRGGGPGAEPATA

>yIRED16

MTRKNVTVIGLGAMGSALANALLAKDLKVTVWNRNKAKAALLAHK GALVAENVK  
AAVEASAFVICVSDYKAAAKIFSEAGKELLHGRTL VQLSTGTPKEARDFDAWARQ  
QGANCLNGDILAWPRQIGTADATITFSGNNEIFKQFETELNALAGVISYLGEEPGASA  
VLFSAVLAYLAGNWIGFCHGALICEKEGMRPDAFGELIYNISPILATESKHMGHVIQH  
NKFTDPESTINTTGLDLHLLVQQSKEAGISDEL PKFAAHIFQRAIDAGYGGEEHAAIK  
VMRGAG

>yIRED17

MRNTRATQRPSRSGDRKHRDRCCGCWRGDRHPLHGPHKENRDATHAPHTHRTPRP  
ARPRAPHRHGRRLVSAPPVAVLGTGRMGAMARALIGAGHPTTVWNRTPERTRPL  
VAAGAVTADTPAAAAAAPLVILCVTDDDAARAVALTDAALQGRTLVNVTTSTP  
EQARAAAALATSYGADYLAAPAMADYRTIGRPETHIMYSGQREAYDRHEDTLHAL  
GKAARYVGADPGIASLFELAMLSLFFEVWTGYLHVLAALIRHEGVPAGDFAPVAART  
FGEISHLPLIAQQVDSGDHPAAAYGGVAEQAAFTDTVIELRRTRGIDTTRLEHLKAL  
MERAITEGKGEQMSALFETLLAAPPGT

>yIRED18

MPDETNSTSSADSTTAADPTVAPTPVTVLGLGAMGQAIAGAFKAGHPTTVWNRSA  
GKGEDLVARGATRAATAADAVRAGELVVVCVVDYDASQAILEPLAADLSGRVLVN  
VTSDSPERARAAAKWAAGHGIAYLGDGAVMIPTVMVGTPEALLFYSGDEAAAYKKHE  
ALLKSLGGQSAYVGADHGLAAVYDLSMLDFFWTSMAGLVHGYALAAKDGVPASA  
LAPFLQSHISLLAVLVGETAKDVDAGVYPGEEGNLAMELEGVEHILHAAELRGLDVS  
VLRGVRDVAKRAVDLGHGADSWTATVEGVRNPGA

>yIRED19

MAKVSVLGLGNMGAIAWAFHKANHDLVVWNRSSERSRPFADADITVAENPVDAI  
AASSFIVVCVDSNPVADSFLQADDVA AVLGGRTVVQFSTSTPKEAEASATWLASRSA  
HYIDGAIHCSPGHIGTDDAAFLLSGDKNYGA VRPFLACLGGDQTFIGETVRAASALE  
LASVCEVYGRFAAVSHAALICEAEGIPLDQLAALMPEGGFSQRYVETIRDGAFENPG  
ATLRIWDSAIQVRVRAQGHADAGIDTRFPDY LADLFNEAINDGLADEHVMALIKVLRKA

>yIRED20

MRQAPANTARPAPVSVLGLGAMGGQLARALLAAGHPTTVWNRTPAKADALVAQG  
ARRARTVADAVAASPLAIVCVLNGEVVHRILEPVGAAALSGKALVNLTSDTPERNRR  
AAAWAAEHGIAYLGGAMLMPPTLVGRPEATILYSGSRRAHAEHEATLKALAGRAPY  
LGPDAGTATAYDVALLSLYYAGLAGMVNAFALAGGEGIPAQDLAPHLDVILGQFPS  
VAVSMARDIDAGRYSGEADVLAIH TAGLAHIIETSRSHGINTDVLRAVKGLVDRAIA  
AGYGDAEFAGVIEEMRA

>yIRED21

MGSFVVRALLRAGHKVTAWNRTTARAEALAPLGADVLT SAGEALVSAQLAIICVGS  
TDDVRHLLDAADPTQLRGQALLNVTSGTPADARSLRDY AHERGIHYLDASIGAYPE  
QIGAHDARILVAGDEELWQAHS AVIRDLAGASLLVGTDYAAANAIDAALTGAFYITS  
LTA FMEAVRFMGSFGISHEVLTSLSTYSISVL DHQAKLALDRVASGDYATDEATLKV  
YADAAAFAAGLGETGEAPMVETTARVLREAVAAGLGAVDIAAIAAPRD

>yIRED22

MNSPTRDLHPRTRPLSDRTTSSVRRVAVLGLGAMGIALARALAAAGHEVTAWNRS  
PKDPVALGFDTV GIRVAAA VEDAVAEAEAVLVCVRDHHASRDVLATIASQIEGDVP  
VVNLSSGTSDQAVASAAAADLAYVTGAIMVPTPLVG TEDNLVLVAGPAGAVRSA  
VPVLEGLGGTIDVLGEDHALPPVLDMAMLDMYFAGMYAFLHSAALVRRHGIEPTA

YLPYARGLHATLGVELDGLAASFENGTYDGGQASLEMCLSFLEHIVATSEDAGVDP  
ALPLLVRDATRRALATSTGDTDWDVVAEGLAHPA

>yIRED23

MGRHDEVARRSEAGDGPAGGARVSVLGLGLMGAAFARALVDAGHSVTVWNRS  
PGRCAEFVARGARAASSTPEDAVRSSDVSLILSNYEVTADLMTQVGDVSGRTLNV  
LSTGDPGSAVRLFDRMTSHGAAAYLDGAIEAYPSEIGRPGTLISYSGSATAWSTYRELL  
LTLAGRSHFLGDDPGAANVLDAAMAGAFYNSALGAFHEAVSFATSSGIALADISFSI  
DYWIDLLRTHLYESVDEIGSGDYTTDQAALNTYLAAVRSWRTTVMAEGQRAHIMT  
ANMHNLEAAACEAGLGSLSLAAHHLTMK

>yIRED24

MDVRISMIGLGRMGSAALARGFLRCGAQVTVWNRDAAKAEALRGEGATVARSLAEA  
LKASDLIAVSVLDTAASHALLFSPASAPLLRGKAVLDFTTSTPAVARAAMQHATDAG  
AQYLDGALMCYPSGVGTPNATILFSGAKTVFDRYEPQLKALGNAMFLGEKAGAAA  
TLDLALLDFYYGATAAMLHGVMCQSEGFPLEIYAKALGGFAPIVAQTAELAATMV  
PARNYTGSEATNDIHAAALALIVQAAKDAKLDPFPEQIMGYFKSALAKGHGPDEIVA  
LVETMRP

>yIRED25

MGNRDTGLTPVTVLGLGLMGQALAGAFRLDGYPTTVWNRRTAAKADGLVAEGAKL  
AGSVRDAVAGGRLVVICVSDYEAVRELLDPLEDVLGRVNVNLTSGTSAQAREIGE  
WAARRGGGYLDGAIMAVPAGIGTADATIVYSGPRTDFDLHEPVLRSLAAGTDRATG  
TDGTAGAEAAGVGAAGTVYLGGDHGLSSLFEVAVLSLMWNILNGFLHGAALLET  
GIKATAFASLAEQAIGTVAGWLPGYAQQIDDGAYPALDSTIDTHLGAMEHLVQESVS  
LGVNAEFPKLIKALTDRAVAGGRGGDGYAALIEQFRKPSEARP

>yIRED26

MREMSEVTVIGLGLMGQALAQAFKAGHATTVWNRSAKAEQLAAQGA VRADSA  
RAAAGASPLVVVCVSDHQAVRELLDPLEDVLGRVNVNLTSGTSEQARETARWAE  
RRGIDYLDGVMVDPQIGTAGAVLYYSGPRPAFDRHEPTLRSLGEGTVYLGADHGL  
SSLYDMAMLTMMWSILNGFLHGAALLGTADVPAATFAPAVVKGMSTVAEWLPGY  
GAQIDSGKYPALDSTVDTHLAAMEHLVHESEALGVSAELPRFVKALADRAVAGGH  
GGEGYAAMIELFRQPAAGG

>yIRED27

MSSHPLHKGRTHDHTSPVPVTVLGLGMMGRALASAFRLRQGHPTTVWNRRTAAKA  
RDLTAQGARPAASVGEAVAASPVVVVCVSDHEAVHALLDPLDGALEGRVNVNLTSS  
TSAQARLTAAWARRGGADYLDGAIMAVPDAIGTAEAVIVHSGSREAFERHEPALSSL  
TANTSYLGEDPGLAALHETAVLSLMWSVLNGFLQGAALLGAAGVDASAFAPLASR  
GIATVADWLPGYAEQVDDGAYPVL DSTIDTHLATMEHVVHESEALGVSAELPRFVR  
DLTRRAVADGHGGEGYAAMIELFRAPSGIRS

>yIRED28

MNTNTKTHEPRAPITVIGLGLMGAAALARTFLKAGHPTTVWNRSAKKADDLVAKGA  
TRAILSEAIRASPLVVLVLDHDAVREVLQONAGDAFTGRVFNLTSETPAQARETA

AWASARGIDYLDGAIMDIPQGVGRPQATLLYSGSRSAFTDWQPALSCLGTGTYLGT  
DAGLAALYDLALLGIMWSTLAGFFHAAALVGTEKIPATTFVPMATGWLSAVAGFLP  
RMAEQVDSGDYETDVSTLGISAVGLGHLVHASEEQGLTSDVPGSLKALFDRAVAKG  
HGGHALASLVEVIRRSKPQ

>yIRED29

MGDNHTSVSVIGLGLMGQALAAFLKAGHATTVWNRSADKADGVVANGAVLAAA  
PADAVAASDLVVVCVSTYDVVHDTVIGSLGDALRGKTVVNLTSGSSEQARQTAEWA  
EKNGARYLDGAIMITPPGIGTETAFLFYAGDQAVFDAHEPVLKLLGAGTTYLGTDHG  
KPALFDVSLGLMWGALNSFLHGVAIVETGGVKAQDFLPWAHMWLDIAKMFTADY  
AAQIDAGDEKFPANDATLETHLGALKHLVEESEALGVDTLPKYSEALMEGIIAQGH  
AKNSYASVVKAYRRPAR

>yIRED30

MTHGVNNPVTIVGLNARGAALARALAVHTRVTVWDGAGHRSEAPHIEGVSRA  
AEFTASPLAVLCGDDYDHRVLETAEPHVSSVDVNLTSVGTGDQAEQVAAWLG  
ARGVDYLDGALMAHPEHVGDPDTVLVLSGSRPVFDRHAAVLARLGSPTYLGSDPG  
AAALYDVAMLNFAWSTLLGFLETAALLGTAGVSATSVSPLLTRWLSGTVAEVITGY  
ASQVDDRRYPGDQDWLELDAPLMDHLVEAARARGIDTALPELIRSLTAKGIEAGHG  
RASFASLVEVLRV

>yIRED31

MTTAPDPATPVTLIGLGMGRAMTRSLAAGHPVTVWNRTASRADGVVADGAVRA  
ASVAAAVRASPLVVLSTDYAAMDDVLGDLGTELDRDRTIVNLSSEGPARTREAADE  
MRAHGARFVVGVMVPPPMVGTAAASVFYSGDEAAFAQYADV LGHIGEPYRLGTD  
PARAQLMYQAHLVDVFLTGLSGLAHATALLGRAGFPASEVMPGLLGMMLAATPDMVA  
DGEPLWAQIDRREYAVELSSATMMGASADHIVLASEELGVDTLPRAVQGHYRAI  
EDGHGAEGWASIVEGIRAPH

>yIRED32

MASICVVGAGRMGSALARAF LRAGYVTHVWNRTPAKGEALAA LGARFVPSLHQAI  
AASDIVVNVIDYAAADAHLRSASVTRALGRKLLVQLTSGSPSQARQTGEWAKGHG  
VGYLDGAIMATPNFIGEPSATILYSGSQHAFDENRDVFLALGGNAVHVGDDDFGHASA  
LDIALLSQLWGTLFGTLQAI AVSQAEGIELDAYARYLQPFKPTIDGAVADLVTRARD  
GRYRGDDQTLAAIAAHYSAFQPLLEVSRRERGLNRAVPDAFDSIFKAAIAAGHLQDDF  
AALTRFMR

>yIRED33

MSNPNAAQAPVTVIGLGLMGQALAAAFIKQGHPTTVWNRTPGKAEQLTADGAILAQ  
SAGKAISASPLVIVCVSDYDGVHEILGPLQGALAGKVLVNLSTGTSAQARETAEWAA  
QRGARYLDGAIMAIPPVIGTDGAVLLYSGPQDSFEEHAATLRALGTPGTTYLGGDHG  
LSALHDMALLGLMWGILNGFLHGAALLGTAGVKATTFAPLANQMIKEVTEYVTAY  
APQVDEGKYPATDATLTVHQDALEHLADESKAVGINSELPRFFKALVDRAAADGRA  
DESYAALIEVFRKEAAA

>yIRED34

MTTDTHADTHIDTAPAPAPVAVLGLGLMGHALAAALLRAGHPTTVWNRTAAKADG  
LVAAGAVRAETPAAAVAAAPLVIACVTDYDALHAFLDPVDPAAALGGRTL VNLTSGT  
SAQARDTAAWAAGRGLTYLDGAIMATPQAIGTAETAIALSGPRDAYDRHTPALRSL  
AGDTPYLGADQGLTSLYEMAMVGMWVSLNGWLQGAALVGTAGVSAAEFTAVA  
AKGLPAVLDWLPGYAKQIDTGTFFPDDATLDTHRVSMAHLVQESES LGVNAEFPALI  
KSLADRAAAAGHGGE GYPVMIEEFRRPAARPA

>yIRE35

MTNNSQVARMARKHDGSPVTVLGLGLMGQALAGAF LRKGHATTVWNRTASKAE  
RLVAQGA KLAGSVRDAASPLVVICVSDHEVVGG LLEQLDDVLDGKVVVNLSSG  
TSAQARDLAARAARRGGALLDGAIMAVPDEVGSKDVAVVYSGSRAAFDAYEPVLR  
DLAEATYLGEDHGLSSLYEVAVMPLMWGILNGFLHGAAMLGAVNVNASAFAPIAE  
QAIGSATRWLAGYARQIDEGVFPVVDV SIDLHRAEMQHVVAESEALGVNAELPKFIR  
AMADRAVAAGHGGESYPAMIELFRAPG

>yIRE36

MSVFHFPPIALSALANPQSSSGSRFIFDPYLNVTAYPKVRNLPAAGRQPYQRASQILEL  
DLMTTIGFLGAGRMGTALVRTLLKNGHHVHVWNRTAEKAEALAAFGAVPASRPEA  
SIDGADIAIVNLLDYSASDAQLRKPAVMQALKGKLLVQLTSGSPKTARNTGIWATDN  
GIAYLDGAIMATPNVIGSSETLILYSGSASHYEKHATLFAELGGKSAFVGEDFGKASA  
LDSALLAQMWGTLFGTLQALAINRAESIDADTYAGFLPLVQPVIDAAEQDLMQRVR  
DGRDRGDDDTLASIAAHGVAFHHLREIVRERGINSAISDAFGS LLETIAIAKGHQDDDF  
AILARFMMAE

>yIRE37

MMHTGTPVAVLGLGLMG SALAGAF LRAGHQTTVWNRTTTKADDLVARGATLAES  
PAAAI AAAPLVVVCVSDYDAVTA ILDGALDGRVVVNLTSGT PSRARALAEVVRRG  
GSYLDGGVMAVPEAIGTADAVLAYSGPRPLYDAHESTLRGLGTGLHLGDDPGLAAT  
HEMATLVLMWGMLDGFLNGAAIVGTAGVSATAYLSIARRAIDTVAGWLPDYARQA  
DNGSYPADDGTIDTHLAAMAHVVEESES LGVNTELPRLVKALAEERANAGHGGSG  
YVALMEQFRKP

>yIRE38

MGAKKKPVTIVGLGPMGRAMTHAYLDRGHQVTVWNRTAGRADEVVAAGAVRAD  
GVADALAAGELVILSLTDYDAMYAILEPASAALSGRVLVNLSSDTPGRAREAAEWA  
AGHGARFLAGGVLTPPSGIGQPTAATFYS GPPEEVFTA YEDTLKVLGTGTDYRGADPGL  
APLHYQIHMDMFWTTMASWLHALALAGAHGISAEVMPYAADATSIQQFLAFYTP  
RIDAGAHPGDVDR LTMGTASVEHVLHTTRDAGVDTALPEALLGVFRRGVAAGHGD  
DSFTSLLEVFREREEA

>yIRE39

MTATTKHPAISVIGLGSMGAALARALVSKGFQVTVWNRNMEKAQPLIAADAIAAAD  
AKAAIEASPVIVVCVSEYK VTRKILEADGVAPALKGRTL VQLSTGTPKDARELDTWA  
KQQGACCLNGDIMAWPKQMGTDAA TISVSGDADVYRQQEDVLRALAGNVVYLGA  
EPGASGGLFHAVLAYLAGSWIGFCHGALVAEKEGLRPEDLGILLEQISPILSAELKHM

GEVIQHGRFSDPESTVKTGEDLLLLVQQAKEAGINSELPEFAAKLQAMDAGYGO  
EEHAAVIKVLQRQA

>yIRED40

MSDVASSPPVSVLGLGSLGSALARALLTAGQPTTVWNRTAGRADDLVTIGASQAPT  
AAAAIAATEIVVIAVADEAAVRGVLGSAAGELAGRVLVNLTSQTPEQARSLAEWAT  
AQGAAYLDGAAMSGVRLVGRADALFLYSGSAEAFATAVEGTVSAFGSAAHLGADAG  
IASLYDTALLGVNMSLLTGFYHALALVGSAGVDAREFAVVATGYLPFALGLLADHA  
RQTVQGGYPPDEGTLVDLASAVDHLVTTTSARAGVRTDVPDGIRALVQRGIDEGHGE  
HGPASLVEVLG

>yIRED41

MIESTGSATAVSILGTGAIGGKIAQTMLAAGTTVTVWNRTPERTDALAARG SARAPS  
AAEAVAASPLVLCVTDYAAVDAVLEATADTIAGRTIVALTTGSPAEAHQAAHKAE  
QAGAAAYLDGGVQTEPENIGSNAATFLYSGPRSAFEHRATLETGSAQYLGADPAA  
AAVQDLTLFGLWYDAQVAYLRALETIRSTGIDVEDFAPLAATQLGHVVHATAGTAH  
EVKTRSFPRGPADLTEHGPVLEQLIELRRGQHLGNGALDHIHHLVQQRIELGHGREG  
LTTIIE

>yIRED42

MSQRVAVLGAGSLGAVIARAFAAAGHPTTVWNRTPDRLSALVADTPALRPALSVPE  
AIADADLITLVVADAAAARAVLDSAGDAIAGKIVVNFTSTTPEQTQVLAGRVLGAGYL  
DGAAMSGTRLVGDPTGLFLYAGDATTADAEPTLRALGIARAVGTDPGDASLWDTA  
LLGLNLGVLFYQAVLIGGSAEKVAASAEYLPFATGLLADHARQIDAKQYPDD  
DGLAVYAAAVDHLIATAADRGVGTDVAVPVRSVINRAIEAGHGDDGLASVTEVLR

>yIRED43

MTTNTSNPTAPGLTLLGLGQMGAALAGRMLDQGRAVTVWNRTPERAAPLVARGA  
ASAETPAEAIARNGLVVTCLLRYASVRETLDPVAASLRGRTLIDLTTTTPDEARELGR  
WAAEHDVEYLN GAIMATPYQIGTPVARILYSGAPDV FARHRDLLAPWAEGVYDGPD  
AGAASLIDLAMLSGMYHMFAGLFHGAAMAATVGMSAQDFASRTIPLIESLV AHFAA  
DAAIIDGGDYSVPGQQSLDFSDLRTSEEAGVDSTTIAAIQALIHQRREAGHGAEG  
FARIYETLRHPESGRDEATEAVRGS

>yIRED44

MGAALAAARFLVSGVATTVWNRTASKAAPLSEAGAHVALDPEEALWRSAVCVVCVE  
DYSQVRDLLSRGVGRGENFHGRTIVNLWTGTVPEAR DARDWVEMYGGRYLDGAIL  
DYPANMGPNALVLYSGDKAAFDEHAELLSTIARPRFEGTDPAAANALGMAGALFHN  
IALAGFYEAAA YAAQHGAARTLFDLTAEIGFDLCARAFSDGLNRIESDDYHTDQSTI  
GIHFDTTLVQEAGFAEIGQAGTLNKAVRDILESATSAGEGGLAMSALYRRFLQIH

>yIRED45

MSLAIIGLGNMGSIAIEAAITGGHQVAVWNRTPEKAEAFADRATVAESLAEIAAATD  
MQVWVLSDYETTEAVLAETGVSAALAGKTFVQLCSGTPAEARALS AKVTDLGARY



LDGKIFTYPARVGAEMTRFAYSGDEVVYKACAPTLKTFGARSGWLGPDPGFAAAAD  
LAWLSYLYGSMVGLFQGLAFTRAEGMPDEAVFGSVPSWLVEIDAEARYSKELIERG  
DFHGGQAELDVHFAAMQHLLDTAQATSISNAFPRMIVDVFGAALERGYGGMEITGG  
LEVFCKP

>yIRED46

MSDEINVEPTAAA VIGLGQMGRRLAQAFLAGGYSTTVWNRSPAKAEALAAQGATR  
AANAGEAVAASSLVVVSLPDYATVRTVLDPVAGQLRGRTL VNLTSGTPHDATAAAA  
AWAAGHGAAAYVDGAAMSGTRLVGRPEALFVLSGSRGAFERHRTVLRSLGNSTYLG  
ADPALASVYDTALFGLAWGALAGFYHSLALVRSAGVDPAEFGAVATAHMPFVTSL  
MTDHARQADEGVFPDDDGTVDVHLAAIEHLSDTSDTQGIGTQVPALFRSLLRQTAA  
EGHGASGIASVIGAIKGRDA

>yIRED47

MSATNVTVLGLGAMGRAAAA VLAGGGVPVTAWNRTVRPGVDPGVRVAPSVVEAV  
ADAPLVLVSVTDQAAATEVLAAGNAVRGRVVNLTTGTPAETAALAADLAGRGA  
TYVGGVVQAQPEQLGTAAAMLLVAGDAEALERHRPTDLLGAVVRVGGDDPERAGR  
YDLTLMGLWYDVQLAVFAAFELAGGDPETFVPFARRQLGFVVDGLPGVARELRVG  
AYPRGPATLVEHARVLAQLVELRAAHGLDTSALERADAAARLIEAGHGEGDFTRL  
AAS

>yIRED48

MDKKINLSKQVTVLGLGAMGTALAEAFIKAGYTTTVWNRSADKTVPLVKKGAVAT  
STVSEAVSASELTVICVLNYDVLEQILKPVAGELRGHTLVSLTNDTPKRARQMALWA  
EEQGIDYLDGSVLVPVTEVGKPEALLYSGPRNIFDKYFPVLKALGGKSTYLGEAPG  
RAALYDIAMMNIFFTSLTGVLHSYALLNAEAGEQAEFLPYAREIFGVAEHFLENFALS  
ADKAHYPGHLDNITMEAAGVKHVVEAGR DAGIHTGVPQAVKDVFDRAIEAGFGAS  
GMPSAIEGIRKAVRAETR

>yIRED49

MSAPDTPDDTTSNQTPRVA VLGTGLMGSAIARSLNNDYPVSVWNRTPGRCPLRE  
LGARTVTTSTEAIRDNDVILMVLDTAARTLLMDAADHLQGKTIANLVTGSAAEAE  
DLSAWVSGQGADYLDGIIAAYPGDIGKPSLTFYAGNVAAWSRYKTLLTALAGAAT  
YVGSKPSAANILDAAMTATFHTVSIGAFLEGMSYARSAGVDLSEIKRTL PYWLDLLS  
QEINVALDSIQADSHTTDQATLETYLVALRTINKAMVGDGERANLLGAAVDNLERA  
HAAGHGQEALSAQILTAKANT

>yIRED50

MKHSKATFIGLGQMGAALVPPFIDAGLQVTVWNRSASKADPLVALGAKAAADFVA  
AVSASDLIIVCLADYTTSNALFHQDEITPLLEGKTIVQLTTGDGREAEALGALWAAEVG  
VNYLDGAIMDYPTKVGPECLLLVSGDRAVWDSCTQMKLLGGRMTYVGSKPSSA  
NLLDGSLLTMYYGNTFALMQSAAMLEAEQVDIKDFKTALNAFKPVIESTWKRTIEAI  
DQQDYSGNEASIHVHSLGVQSLLKRAKKS GVEHGLLQLFSEYVDQTAARGHEADEL  
PAAFEVFRKKG

>yIRED51

MAEGDLEIGMNEISMIGLGAMGTALAMAQIEAGRNVTIWNRRSSQKMAPLVALGAK  
GAENVAAAIKASPVIICIDNYAATNAIMNVKDVVEHLPGRCVIQLGTGTPEEARTSE  
TWFNAREVDYLDGIIQYPYDGIQEPDAQLLFSGSKSVFQKSLPFLKCLGGDLRFVGEK  
VGAAAALDLAGLSCSLGQYVGFAGHARLCEAEGVSIHFANLYPEGNRLRELAIEIHH  
HEAFTLRSLHDGASIRIWEECIQRLQAQAQDVNMNRDFPDNISRLFKRAIAAGIGEOD  
LAALVKVLRD

>yIRED52

MKNPSPIPLPRVVILGAGLMGSAIARELLRLGCSVDVWNRTPAKTTPLVQEGAGTGT  
LQSVMTGPALVLLCLSNYETARAVLAEAEELRDAALVNLVTGSPTEAEFSSWASE  
RGARYLDGAIEAYPNDIGQSTTLVNYSGHVDVWTDHRELLLAAGASTYVGERPGA  
ANVLDAAMAGSFYNVSIGAFLEAQSYALSQGVTPQQLRSGLPYWLELLRRSLEEGIS  
AVEGGVYDQATLVVYHDAVRSWLSTVNHADQRSTLLTANEESLRSVAAGHGPR  
RSIFAQHLLTSKSVFS

>yIRED53

MMQPHVPSDTTVTVLGLGLMGRALAHAFRLSGHPTTVWNRTPAKAEQLIADGAVP  
AESAAEAVAASPLVVVCVTDGDAVRDVLGSVDARVLEGRVVVNLTSSTSEEARQIA  
EWATGSRATYLAGAISASPSDIGGEGAAILYAGPRWAFDQHAGILEPLAAGTTYLGE  
DHGLASLYDAATLGLMWGILNAYLHGAALLEAAGVDAVTFAPLASAGVRTVVDW  
LPGIAEQVDTGRYPVAVDASLDIHVAAMGHLLDENESLGIDTGLPRFVKDLADRAVA  
AGHGGSDYAAMIEQFRKPAGHFE

>yIRED54

MTQNRDADRTPVTVIGLGLMGQALAGAFRLAAHPTTVWNRSAAKAEPLIAQGATL  
ADSIADAVAASPLVVVCLSDYDTAHKLLDPVGELLDGRTL VNLTSGTSAQAHETA  
WAARHGSAYLDGVILAVPQGIGTADAIIVYSGPRAAFDL YEPVLRSLTEATTYLG  
HALSALHDMAVLGMMWGVNLGFLQGAALLGAAGVDPAGFVPLVRQGIGIVTDWL  
PGYARQIAAGTFPALDATLDTHRAAMEHLAQESES LGVNADLPRFIQALADRAVAD  
GRGGDGYAAMIEQFRKPSGARS

>yIRED55

MGRALAGALLAAGHDVTVWNRTPGRDGALLAQGARPAESAAEAVATATTTATAT  
AASAASSAAAAGSPLVLLCVRDQSAARAVLDAAGAALRGRTVVNATSITPEDARAN  
AADARARGFRLLAAILTPPTIGRPQGTVLLSGDPEAFTAHEPTLRALGTVRHVGTD  
PGRAAAFDAALLDLFWTTVHGLVHALALARAEGISGTELTPYAQGLPQLLPLIEDF  
ARRADERRHPGDHSSLASAEAGLSHVAHTARARGLDTTVLDAALAVTRRAVEAGH  
GSDGVSGLVELFARQATASSTGPATTGPAAAPSNRRRPAGRPR

>yIRED56

MAEKTVSVIGMGSMGSALAKAFLANNHPVTVWNRTASKCTPLEQAGAKVAKSVV  
DAAEASQVMVISLLNYEATQSLLQTPEVIEKLGKGVIVQLSTGFPREARESEAWANQ  
NGISYLDGAILEYPTGIGKEESVFFYSGSEKVFEENKALLRCLAGNPRFVKGKDAGHAA  
TLDISTISVYYGASLGLFHGAICNSEGFPVDKYL SATIPLLSGLIPDTLNMSEKMINE  
GSYTAKIATLDVHVAGLKHLLFIKENRLDTAFMECVLGYCKKA VDMGYTQDELA  
AVFEVMKMKVDDKIE

>yIRED57

MAVLGAGSVGSGLVVRGLLAGGHPVTVWNRTLRRCEPLSAAGATIVPAPELAIRRAGI  
VFSTLSTYAAAREALAQVPDDCLAGRLVVQLSGGTAQEAAVLGDLVRSRGGRYLD  
GLLFSYPSAFSDATAILFFAGAEADYEELRRGVFHATSWDSTFVGEHLGTPNQISTMF  
EVSIALSMEGFLVGAALAEAVGMSVQTYCDLLVPRFVPTVASMMEESAERVVTGDY  
TGEMAIDLWQHVVTRLVGEVESHGVDATALEVVGQQMRRAVAAGFGHGDIAAIYE  
AIRRPRDRR

>yIRED58

MSKQAVTIIGLGPMPGKAMVNRFLDEGHPVTVWNRTARKADDLVARGAHRAATVE  
EALAANEVVVLSLTDFEAMYAILKPAETALAGRIVIVNLGSDTPGRAREAAKWATAH  
GAGYLTGGVMSAPSGIGAPESFTYYSGQKEIFEAHKETLEVLTGTDYRGSDPGSAAL  
YYQLHINMFWTTVISFVHSLAMARANGISAQEFVGPASNSMTDMSAFLEFYAKRIDN  
DEHPGDVDRLAMAEASVDHVHTAKEAGVDHALPAAVLELIRRGMAAGHADDSFT  
SLFEVFRKAG

>yIRED59

MGNDEGGRTAVTVVGLGLMGRALAAALLRAGHRTTVWNRTASKADELLAEGALF  
APSVHDAVTAAPLVVFCVSDHDALHDLLAPLDGAALDGHTLVNLTSGTPAQARETA  
AWAAARGAAYLDGGIMATPQEVGTPAAHVVCVCGPRQALEPHRPVLSALAGGTTHL  
GEDHGLVALHEMAVMALMWSTLNGFLQGAALLGAAGVDAGAFVPYARQGAEAV  
TGWLADHARQIDAGGYPVLDATLGTHLTSMRNLVLESEALGVSTELPRLVAGFADR  
AVAGGHGGDSYAALIEEFRNPAPGRPGAPRSEQPEE

>yIRED60

MKPGISVLGTGRMGSAVLGAFKQGYNVAVWNRTKSKCAPLAALGARVATTVRD  
AVADAEVVVVNVNDYVTSEALLRQDDVTKGLRGKLVQLTSGSPRQAREMAAWAR  
QHELQYLDGAIMGTPNFIGEPGGTILYSGPGALFEKYKPVLLVLGGNSLHVGSVDVGH  
ASALDSALLSFLWGSMTFVQLQAVSVCEAEGPLPGAYMEYVQATKPMVDGAVTDFV  
KRIQTGRFAGDEKTLATVEAHHGALRHIELCEEHGIHHA VPAAFGQLFQAALQAGH  
AQDDFAVLNKFMK
